# Supplementary material for: A small molecule promotes cartilage extracellular matrix generation and inhibits osteoarthritis development
Source: PubMed Central journal article supplement (PMC6478911; doi:10.1038/s41467-019-09839-x), 2019-04-23
Supplement: 41467_2019_9839_MOESM1_ESM.pdf [file 41467_2019_9839_MOESM1_ESM.pdf]

## **Supplementary Information**

**A small molecule promotes cartilage extracellular matrix generation and inhibits osteoarthritis development**

**Shi et al.**

### N-[2-bromo-4-(phenylsulfonyl)-3-thienyl]-2-chlorobenzamide (BNTA)

The characterization data of BNTA: **Melting point (mp):** 148-149 °C; **<sup>1</sup>H-NMR** (600 MHz, DMSO-*d*<sub>6</sub>)  $\delta$ : 10.15 (s, 1H, N-*H*), 8.68 (s, 1H, thiophene), 7.52-7.94 (m, 9H, aryl); **<sup>13</sup>C-NMR** (150 MHz, DMSO-*d*<sub>6</sub>)  $\delta$ : 165.72, 140.97, 137.73, 135.98, 135.56, 134.32, 132.54, 131.88, 130.78, 130.40, 129.98, 129.62, 127.70, 127.59, 115.55; **HRMS:** [M+H]<sup>+</sup> calcd for C<sub>17</sub>H<sub>12</sub>NO<sub>3</sub>S<sub>2</sub>ClBr, 455.9131; found, 455.9128.

### Supplementary figure legends

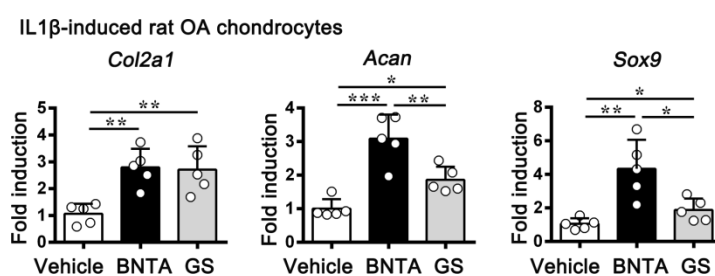

**Supplementary Fig. 1** The collagen type II alpha 1 chain (*Col2a1*), aggrecan (*Acan*), and SRY-box 9 (*Sox9*) mRNA levels were evaluated after BNTA (0.1  $\mu$ M) treatment compared with glucosamine sulfate (GS, 500  $\mu$ M) in interleukin 1 beta (IL1 $\beta$ , 10 ng ml<sup>-1</sup>)-induced rat osteoarthritis (OA) model at 6 h (n = 5 for each group; *Col2a1*, *Acan*, one-way ANOVA; *Sox9*, nonparametric test). Data are shown as the mean  $\pm$  standard deviation (s. d.). \**P* < 0.05, \*\**P* < 0.01, \*\*\**P* < 0.001. Source data are provided as a Source Data file.

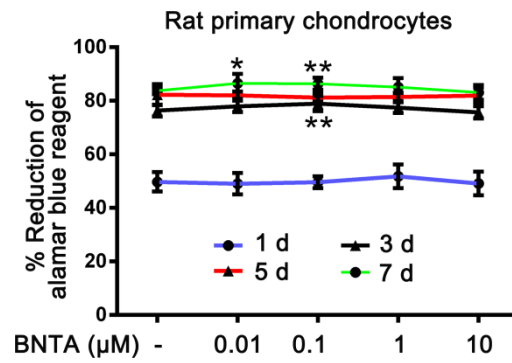

**Supplementary Fig. 2** Cell viability of rat primary chondrocytes detected using the alamar blue assay after BNTA treatment for 1 d, 3 d, 5 d, and 7 d (n = 14 for each group; 1 d and 3 d, one-way ANOVA; 5 d and 7 d, nonparametric test). Data are shown as the mean  $\pm$  standard deviation (s. d.). \* $P < 0.05$ , \*\* $P < 0.01$ . Source data are provided as a Source Data file.

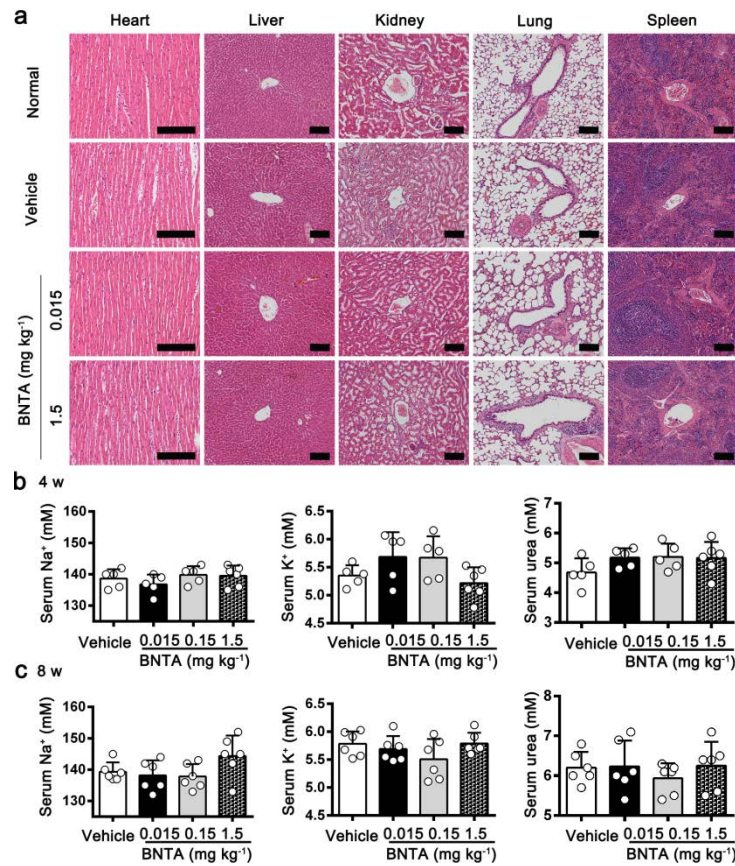

**Supplementary Fig. 3** Toxicity of BNTA was detected with H&E staining and biochemical assays of serum *in vivo*. **a**, Histological features of rat heart, liver, kidney, lung, and spleen stained with H&E after treatment with BNTA or vehicle at 8 w (scale bars, 200  $\mu\text{m}$ ;  $n = 4$ ). **b**, Concentrations of serum  $\text{Na}^+$ ,  $\text{K}^+$ , and urea of rats treated with BNTA or vehicle evaluated by biochemical assays at 4 w (vehicle, 0.015, 0.15  $\text{mg kg}^{-1}$ ,  $n = 5$ ; 1.5  $\text{mg kg}^{-1}$ ,  $n = 6$ ; one-way ANOVA). **c**, Concentrations of serum  $\text{Na}^+$ ,  $\text{K}^+$ , and urea of rats in BNTA or vehicle groups at 8 w ( $n = 6$  for each group; one-way ANOVA). Data are shown as the mean  $\pm$  standard deviation (s. d.). Source data are provided as a Source Data file.

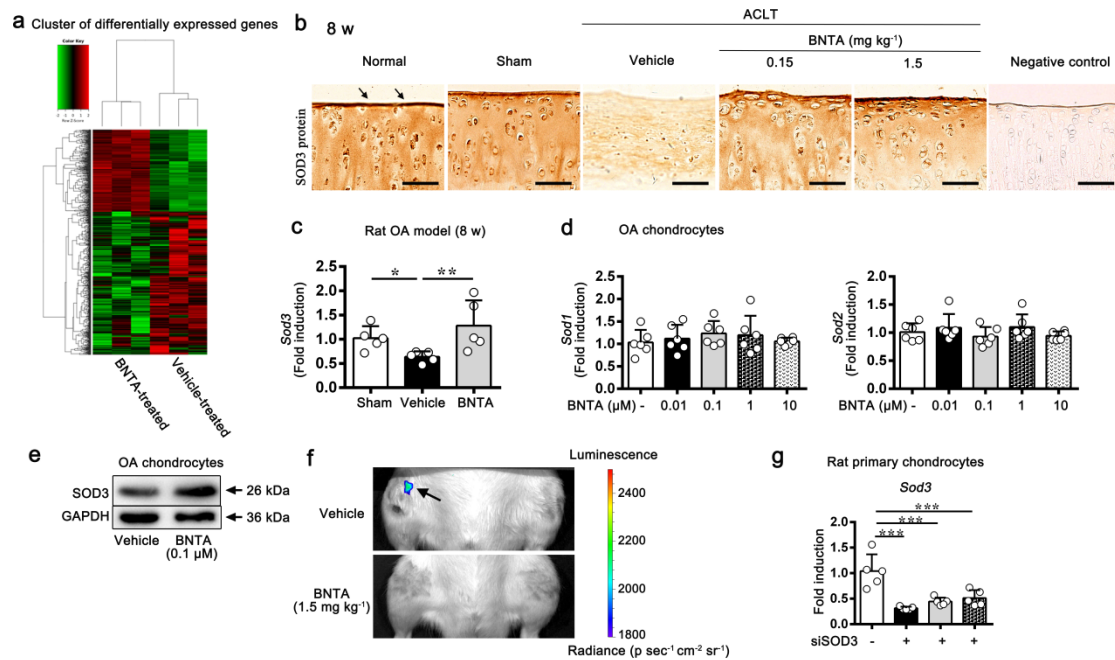

**Supplementary Fig. 4** Superoxide dismutase 3 (SOD3) was activated by BNTA. **a**, Cluster of differentially expressed genes in BNTA or vehicle-treated anterior cruciate ligament transection (ACLT) rats assessed by RNA sequencing. **b**, Immunostaining for SOD3 protein in normal, sham, vehicle, and BNTA-treated (0.15, 1.5 mg kg<sup>-1</sup>) rats at 8 w (brown, arrows; scale bar, 50 μm). **c**, *Sod3* mRNA levels in cartilage tissue of the rat osteoarthritis (OA) model at 8 w (nonparametric test; n = 5 for each group). **d**, Quantification of mRNA levels for *Sod1* and *Sod2* in interleukin 1 beta (IL1β, 10 ng ml<sup>-1</sup>)-induced rat OA chondrocytes after BNTA or vehicle incubation for 6 h (one-way ANOVA; n = 6 for each group). **e**, SOD3 protein levels in IL1β (10 ng ml<sup>-1</sup>)-induced rat OA chondrocytes from the BNTA (0.1 μM) or vehicle groups at 2 d. **f**, Chemiluminescence signal of the ACLT-induced knee joint after vehicle or BNTA (1.5 mg kg<sup>-1</sup>) treatment at 8 w with intravenous injection of luminol. Arrow showed the reactive oxygen species (ROS) produced in the knee joint. **g**, *Sod3* mRNA levels in rat primary chondrocytes after treatment with three siSOD3s at 24 h (one-way ANOVA; n = 5 for each group). Data are shown as the mean ± standard deviation (s. d.). \**P* < 0.05, \*\**P* < 0.01. Source data are provided as a Source Data file.

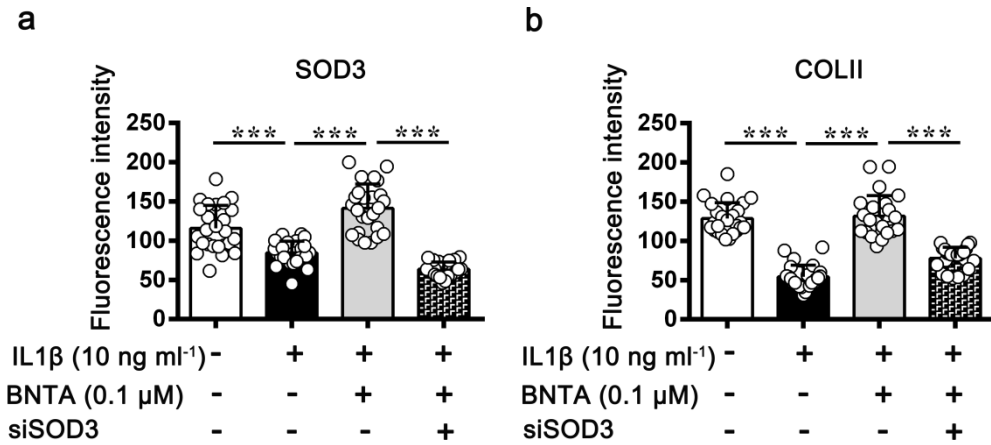

**Supplementary Fig. 5** The fluorescence intensity of superoxide dismutase 3 (SOD3) and type II collagen (COLII) in rat primary chondrocytes was quantified using LAS\_X software when cultured with interleukin 1 beta ( IL1 $\beta$ , 10 ng ml<sup>-1</sup>), BNTA (0.1  $\mu$ M), or siSOD3 for 2 d (n = 25 for each group; nonparametric tests). Data are shown as the mean  $\pm$  standard deviation (s. d.). \*\*\* $P$  < 0.001. Source data are provided as a Source Data file.

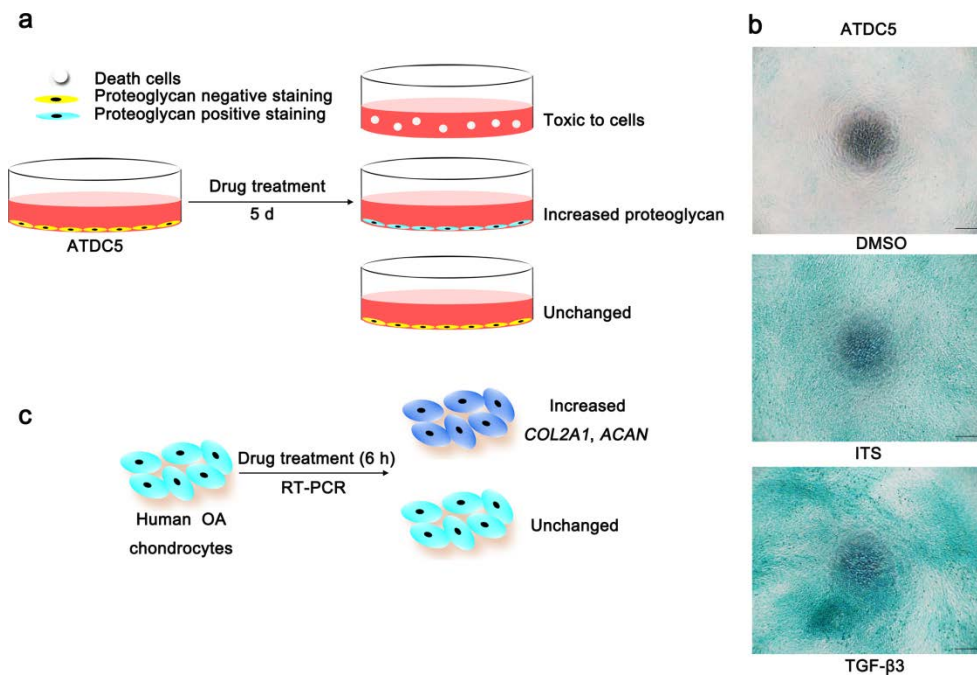

**Supplementary Fig. 6** Development of an effective assay to screen for candidate of disease-modifying osteoarthritis drug (DMOAD). **a**, Scheme of alcian blue staining outcomes after treating ATDC5 cells with the small compounds library for 5 d. **b**, Alcian blue staining in ATDC5 cells after stimulation with transforming growth factor- $\beta$ 3 (TGF- $\beta$ 3) or insulin-transferrin-selenium (ITS; scale bar, 200  $\mu$ m). **c**, Schematic diagram of possible results after treating human osteoarthritis (OA) chondrocytes with prospective candidates, as evaluated with reverse transcription polymerase chain reaction (RT-PCR).

Supplementary Table 1 The excluded candidates for the experiments

| <b>Product Name</b>                                               | <b>References</b>                                                                          |
|-------------------------------------------------------------------|--------------------------------------------------------------------------------------------|
| NS-398                                                            | <i>J RHEUMATOL.</i> 28, 2509-2519 (2001)                                                   |
| Melatonin                                                         | <i>Br J Pharmacol.</i> 175, 3230–3238 (2018)                                               |
| Harmine HCl                                                       | <i>BIOCHIMIE.</i> 95, 374-381 (2013)                                                       |
| Kaempferol                                                        | <i>Med Sci Monit.</i> 23, 3925-3931 (2017)                                                 |
| CL-82198                                                          | <i>CURR MED CHEM.</i> 18, 977-1001 (2011)                                                  |
| Z-FA-FMK                                                          | <i>OSTEOARTHR CARTILAGE.</i> 23, A57 (2015)                                                |
| SB220025                                                          | <i>SCAND J RHEUMATOL.</i> 36, 247-258 (2007)                                               |
| SD-208                                                            | <i>GROWTH FACTORS.</i> 24, 268-278 (2006)                                                  |
| Cryptotanshinone                                                  | <i>INT IMMUNOPHARMACOL.</i> 50, 161-167 (2017)                                             |
| CXCR4 Antagonist I,<br>AMD3100                                    | <i>J ORTHOP RES.</i> 33, 1071-1078 (2015)                                                  |
| SB 203580, Sulfone                                                | <i>McGill University Montreal,(Quebec),Canada.</i><br>(2011)                               |
| Histone Deacetylase Inhibitor<br>CP-690550                        | <i>Osteoarthritis Cartilage.</i> 21, 1987-1996 (2013).<br><i>JAMA.</i> 297, 28-29 (2007)   |
| Propyl gallate                                                    | <i>Free Radic Res.</i> 30, 395-405 (1999)                                                  |
| Sphingosine                                                       | <i>Osteoarthritis Cartilage.</i> 6, 393-399 (1998)                                         |
| Kenpaullone                                                       | <i>INT J CLIN EXP MED.</i> 4, (2016)                                                       |
| Pifithrin- $\alpha$ , Cyclic-<br>SIRT1 Inhibitor IV, (S)-35       | <i>Arthritis Rheum.</i> 60, 2340-2349 (2009)<br><i>J ORTHOP RES.</i> 29, 511-515 (2011)    |
| SAHA                                                              | <i>AM J PATHOL.</i> 186, 2701-2708 (2016)                                                  |
| Prostaglandin J2                                                  | <i>J BIOL CHEM.</i> 279, 37939-37950 (2004)                                                |
| 5-Aza-2-deoxycytidine                                             | <i>ANN RHEUM DIS.</i> 66, 1616-1621 (2007)                                                 |
| Amphotericin B                                                    | <i>INFECTIO.</i> 25, 112-116 (1997)                                                        |
| JNK Inhibitor                                                     | <i>Arthritis Rheum.</i> 56, 2663-2673 (2007)                                               |
| Oxytetracycline, a -apo-<br>p38 MAP Kinase Inhibitor<br>VI, JX401 | <i>J BONE MINER METAB.</i> 28, 627-633 (2010)<br><i>J Inflamm (Lond).</i> 5, 22 (2008)     |
| p38 MAP Kinase Inhibitor<br>VIII                                  | <i>J Inflamm (Lond).</i> 5, 22 (2008)                                                      |
| E-caryophyllene                                                   | <i>EUR J PHARMACOL.</i> 750, 141-150 (2015)                                                |
| Alsterpaullone                                                    | <i>MOL MED REP.</i> 7, 603-607 (2013)                                                      |
| Carnosic acid                                                     | <i>MOLECULES.</i> 21, 465 (2016)                                                           |
| PKCbII/EGFR Inhibitor                                             | <i>Mediators Inflamm.</i> 2013, 326041 (2013)                                              |
| Lavendustin A                                                     | <i>Proc Natl Acad Sci U S A.</i> 105, 7467-7471 (2008)                                     |
| Tranylecypromine                                                  | <i>ARTHRITIS RES THER.</i> 16, R113 (2014)                                                 |
| JAK Inhibitor I                                                   | <i>Tissue Eng Part A.</i> 20, 2243-2252 (2014)                                             |
| CCR2 Antagonist<br>A77 1726                                       | <i>ANN RHEUM DIS.</i> 76, 914-922 (2017)<br><i>ARTHRITIS RES THER.</i> 6, R181-R189 (2004) |
| trans-Retinoic Acid                                               | <i>J CELL PHYSIOL.</i> 159, 340-346 (1994)                                                 |
| Cyclopamine                                                       | <i>INT J MOL SCI.</i> 14, 5966-5977 (2013)                                                 |



---

|                          |                                                                      |
|--------------------------|----------------------------------------------------------------------|
| Adenosine                | <i>Osteoarthritis Cartilage</i> . 14, 486-495 (2006)                 |
| Gingerol                 | <i>J CELL BIOCHEM</i> . 118, 1003-1013 (2017)                        |
| Lycorine HCl             | <i>MOL MED REP</i> . 14, 3389-3396 (2016)                            |
| Nicotine, (-)-           | <i>Osteoarthritis Cartilage</i> . 13, 942-943 (2005)                 |
| URB-597                  | <i>PAIN</i> . 152, 975-981 (2011)                                    |
| Bisindolylmaleimide I    | <i>J BIOL CHEM</i> . 282, 2929-2936 (2007)                           |
| Gö 6976                  | <i>J BIOL CHEM</i> . 281, 24124-24137 (2006)                         |
| NDGA                     | <i>Arthritis Rheum</i> . 26, 771-774 (1983)                          |
| Tetramethylpyrazine      | <i>J ETHNOPHARMACOL</i> . 132, 414-420 (2010)                        |
| Mithramycin A            | <i>ARTHRITIS RES THER</i> . 7, R777-R783 (2005)                      |
| Actinonin                | <i>MATRIX BIOL</i> . 19, 333-344 (2000)                              |
| GM6001                   | <i>Osteoarthritis Cartilage</i> . 14, 738-748 (2006)                 |
| Enalapril                | <i>DARU: Journal of Pharmaceutical Sciences</i> . 15, 199-204 (2007) |
| SB 203580                | <i>J IMMUNOL</i> . 161, 467-473 (1998)                               |
| SB202190                 | <i>Osteoarthritis Cartilage</i> . 18, 1509-1517 (2010)               |
| BMS-5                    | <i>PLOS ONE</i> . 6, e28663 (2011)                                   |
| MCI-186                  | <i>Biochem Biophys Res Commun</i> . 473, 840-844 (2016)              |
| EPA                      | <i>ARTHRITIS RES THER</i> . 12, R207 (2010)                          |
| Thymoquinone             | <i>xp Biol Med (Maywood)</i> . 235, 1425-1431 (2010)                 |
| Tyrphostin 1             | <i>Arthritis Rheum</i> . 48, 404-409 (2003)                          |
| Tetrandrine              | <i>EVID-BASED COMPL ALT</i> . 2013, 1-8 (2013)                       |
| Quercetin                | <i>J NUTR BIOCHEM</i> . 23, 106-112 (2012)                           |
| Myricetin                | <i>INT J PHARMACOL</i> . 4, 440-450 (2016)                           |
| Cambinol                 | <i>JOINT BONE SPINE</i> . 79, 570-573 (2012)                         |
| 17 $\beta$ -Estradiol    | <i>BONE</i> . 39, 310-317 (2006)                                     |
| Splitomycin              | <i>JOINT BONE SPINE</i> . 79, 570-573 (2012)                         |
| Salermide                | <i>JOINT BONE SPINE</i> . 79, 570-573 (2012)                         |
| Baicalein                | <i>CELL PHYSIOL BIOCHEM</i> . 36, 325-333 (2015)                     |
| Betulinic Acid           | <i>INT IMMUNOPHARMACOL</i> . 29, 687-692 (2015)                      |
| Phorbol 12,13-dibutyrate | <i>EXP CELL RES</i> . 201, 245-249 (1992)                            |

---
